# Supplementary material for: Effects of underlying morbidities on the occurrence of deaths in COVID-19 patients: A systematic review and meta-analysis
Source: PubMed Central journal article supplement (PMC7567434; doi:10.7189/jogh.10.020503), 2020-12
Supplement: jogh-10-020503-s001.pdf [file jogh-10-020503-s001.pdf]

**Effects of underlying morbidities on the occurrence of deaths in COVID-19 patients: A systematic review and meta-analysis**

## Supplemental Tables

**Table S1.** Medline search results for pre-existing morbidities among COVID-19 patients

| # | Searches                                                                                                                                                                                                                                                                                                                                     | Results |
|---|----------------------------------------------------------------------------------------------------------------------------------------------------------------------------------------------------------------------------------------------------------------------------------------------------------------------------------------------|---------|
| 1 | (COVID-19 or 2019-nCoV or Coronavirus or SARS-CoV-2).mp. [mp=title, abstract, original title, name of substance word, subject heading word, floating sub-heading word, keyword heading word, organism supplementary concept word, protocol supplementary concept word, rare disease supplementary concept word, unique identifier, synonyms] | 17285   |
| 2 | (Comorbidit* or Morbidit*).mp. [mp=title, abstract, original title, name of substance word, subject heading word, floating sub-heading word, keyword heading word, organism supplementary concept word, protocol supplementary concept word, rare disease supplementary concept word, unique identifier, synonyms]                           | 573824  |
| 3 | (Mortalit* or Death or Died*).mp. [mp=title, abstract, original title, name of substance word, subject heading word, floating sub-heading word, keyword heading word, organism supplementary concept word, protocol supplementary concept word, rare disease supplementary concept word, unique identifier, synonyms]                        | 1826650 |
| 4 | 1 and 2 and 3                                                                                                                                                                                                                                                                                                                                | 433     |
| 5 | limit 4 to (english language and yr="2019 -Current")                                                                                                                                                                                                                                                                                         | 146     |

**Table S2.** CINAHL search results for pre-existing morbidities among COVID-19 patients

| #  | Query                                                                                                                             | Limiters/Expanders                                                                                                                                   | Last Run Via                                                                                                       | Results |
|----|-----------------------------------------------------------------------------------------------------------------------------------|------------------------------------------------------------------------------------------------------------------------------------------------------|--------------------------------------------------------------------------------------------------------------------|---------|
| S1 | “( covid-19 OR 2019-ncov OR coronavirus OR sars-cov-2 )<br>AND ( comorbidit* OR morbidit* ) AND ( mortalit* OR<br>deat* OR died ) | Limiters - Published Date: 20191201-<br>20200431; English Language<br><br>Expanders - Apply equivalent subjects<br><br>Search modes - Boolean/Phrase | Interface - EBSCOhost<br>Research Databases<br>Search Screen -<br>Advanced Search<br>Database - CINAHL<br>Complete | 19      |

**Table S3.** Web of science search results for pre-existing morbidities among COVID-19 patients

| Search terms                                                                                                                                                                                                                                          | Results |
|-------------------------------------------------------------------------------------------------------------------------------------------------------------------------------------------------------------------------------------------------------|---------|
| (covid-19 OR 2019-ncov OR coronavirus OR sars-cov-2) AND TOPIC: (comorbidit* OR morbidit*) AND TOPIC: (mortalit* OR deat* OR died)<br><b>Timespan:</b> 2019-2020. <b>Indexes:</b> SCI-EXPANDED, SSCI, A&HCI, CPCI-S, CPCI-SSH, ESCI, CCR-EXPANDED, IC | 64      |

**Table S4.** SCOPUS search results for pre-existing comorbidities and the mortality risk in COVID-19

| Search strategy                                                                                                                                                                                                  | Results |
|------------------------------------------------------------------------------------------------------------------------------------------------------------------------------------------------------------------|---------|
| TITLE-ABS-KEY ((( covid-19 OR 2019-ncov OR coronavirus OR sars-cov-2 ) AND ( comorbidit* OR morbidit* ) AND ( mortalit* OR death* OR died ))) AND ( LIMIT-TO ( PUBYEAR , 2020 ) OR LIMIT-TO ( PUBYEAR , 2019 ) ) | 142     |

**Table S5.** Narrative review for pre-existing morbidities and mortality risk among patients in COVID-19 infection.

| <b>Study</b>           | <b>Study design, Country</b> | <b>Sample</b>                                                                                                                 | <b>Results</b>                                                                                                                                                                                                                                                                                                                          |
|------------------------|------------------------------|-------------------------------------------------------------------------------------------------------------------------------|-----------------------------------------------------------------------------------------------------------------------------------------------------------------------------------------------------------------------------------------------------------------------------------------------------------------------------------------|
| Grasselli et al., 2020 | Retrospective cohort, Italy  | Total of 1591 COVID-19 patients admitted into ICU in 72 hospitals from 20 February to 18 March 2020                           | Around 49% of the patients had hypertension, 21% had cardiovascular disease, 18% had hypercholesterolemia, 17% had type-2 diabetes, and 8% had malignancy. A total of 405 (26%) patients died. Around 38% of the patients with hypertension were died in ICU as compared to 16% discharged.                                             |
| Du et al., 2020        | Prospective cohort, China    | Total of 109 died COVID-19 patients from three hospitals in Wuhan, China. Data were collected from 25 Dec to 15 February 2020 | COVID-19 patients who were died mostly had pre-existing hypertension (59.6%), cardiovascular disease (33.9%), diabetes (31.2%), digestive disorders (16%), chronic respiratory diseases (15.6%), malignancy (7.3%), chronic kidney disease (7.3%), 7.3% had peripheral vascular disease.                                                |
| Zhang et al., 2020     | Retrospective cohort, China  | Total of 82 died COVID-19 patients admitted Wuhan University's hospital from 11 January to 10 February 2020.                  | Patients died following secondary COVID-19 mostly had pre-existing hypertension (56.1%) following cardiovascular disease (20.7%), diabetes (18.3%), immunodeficiency (17.1%) chronic respiratory diseases (14.6%), cerebrovascular disease (12.2%), malignancy (7.3%), chronic kidney disease (4.9%), and chronic liver disease (2.4%). |
| Kim et al., 2020       | Retrospective cohort, Korea  | Sample consisting of 101 deceased patients from February 19 to March 20, 2020                                                 | COVID-19 patients who were died mostly had pre-existing hypertension (64.4%), cardiovascular disease (21.8%), diabetes (43.6%), digestive disorders (16%), chronic respiratory diseases (27.7%), dementia (25.7), dyslipidaemia (15.8%), cerebrovascular disease (15.8%), malignancy (15.8%), and renal diseases (14.8%).               |
| Yao et al., 2020       | Retrospective cohort, China  | Sample of 55 patients who died were collected from East Hospital of Wuhan University as of February 18, 2020                  | Patients died following secondary COVID-19 mostly had pre-existing hypertension (60%) diabetes (26%), cardiovascular (31%), cerebrovascular disease (22%), malignancy (7%), chronic lung diseases (22%), chronic kidney disease (9%), and chronic liver disease (6%).                                                                   |
| Cheng et al., 2020     | Prospective cohort, China    | Total of 701 COVID-19 patients from China                                                                                     | Around 16.1% (113 person) died in hospital. Patients with acute kidney injury were reported higher risk of death with a gradual increase across stages of injury: stage 1 (HR, 3.51; 95% CI, 1.53-8.02), stage 2 (HR, 6.24; 95% CI, 2.73-14.27), stage 3 (HR, 9.81; 95% CI, 5.46-17.65).                                                |

**Table S6.** Newcastle-Ottawa scale assessment of study quality for **cross-sectional study**

| Author             | Selection                        |             |                           |                 | Comparability                                                                                                                       |                       | Outcome                         |   | Study quality |
|--------------------|----------------------------------|-------------|---------------------------|-----------------|-------------------------------------------------------------------------------------------------------------------------------------|-----------------------|---------------------------------|---|---------------|
|                    | 1                                | 2           | 3                         | 4               | 5                                                                                                                                   | 6                     | 7                               |   |               |
|                    | Representativeness of the sample | Sample size | Ascertainment of exposure | Non-respondents | The subjects in different outcome groups are comparable, based on the study design or analysis. Confounding factors are controlled. | Assessment of outcome | Statistical test is appropriate |   |               |
| Solis et al., 2020 | *                                | *           | *                         |                 | *                                                                                                                                   |                       | *                               | 5 |               |

**Table S7.** Newcastle-Ottawa scale assessment of study quality for **cohort study**

| Author            | Selection                           |                                                  |                           |                                          | Comparability                      |                                       | Outcome                       |                                             |                                 | Study quality |
|-------------------|-------------------------------------|--------------------------------------------------|---------------------------|------------------------------------------|------------------------------------|---------------------------------------|-------------------------------|---------------------------------------------|---------------------------------|---------------|
|                   | 1                                   | 2                                                | 3                         | 4                                        | 5A                                 | 5B                                    | 6                             | 7                                           | 8                               |               |
|                   | Exposed cohort truly representative | Non-exposed cohort drawn from the same community | Ascertainment of exposure | Outcome of interest not present at start | Cohorts comparable on basis of age | Cohorts comparable on other factor(s) | Quality of outcome assessment | Follow-up long enough for outcomes to occur | Complete accounting for cohorts |               |
| Guan et al., 2020 | *                                   | *                                                | *                         |                                          | *                                  | *                                     | *                             | *                                           | *                               | 8             |
| Cao et al., 2020  | *                                   | *                                                | *                         |                                          | *                                  | *                                     | *                             | *                                           | *                               | 8             |
| Chen et al., 2020 | *                                   | *                                                | *                         |                                          | *                                  | *                                     | *                             | *                                           | *                               | 8             |
| Deng et al., 2020 | *                                   | *                                                | *                         |                                          |                                    | *                                     | *                             | *                                           | *                               | 7             |

|                                 |   |   |   |   |  |   |   |  |   |   |   |   |
|---------------------------------|---|---|---|---|--|---|---|--|---|---|---|---|
| Yang et al., 2020               | * | * | * |   |  | * | * |  | * | * | * | 8 |
| Wu et al., 2020                 |   | * | * |   |  |   | * |  | * | * | * | 6 |
| Chen et al., 2020               | * | * | * |   |  | * | * |  | * | * | * | 8 |
| Zhou et al., 2020               | * | * | * |   |  | * | * |  | * | * | * | 8 |
| Yuan et al., 2020               | * | * | * |   |  |   | * |  | * | * | * | 7 |
| Chen et al., 2020               | * |   | * | * |  |   | * |  | * | * |   | 6 |
| Caramelo et al., 2020           | * |   |   |   |  | * | * |  |   | * | * | 5 |
| Ren et al., 2020                | * | * | * |   |  | * | * |  | * | * | * | 8 |
| Australian<br>Government., 2020 | * | * |   |   |  | * | * |  | * | * | * | 7 |
| Shi et al., 2020                | * |   | * |   |  | * | * |  |   | * | * | 6 |
| Zhang et al., 2020              | * | * |   | * |  | * | * |  | * | * |   | 7 |
| Du et al., 2020                 | * | * | * |   |  | * | * |  | * | * | * | 8 |
| Wang et al., 2020               | * | * | * | * |  | * | * |  |   | * | * | 8 |
| Fu et al., 2020                 | * | * |   |   |  | * | * |  |   | * | * | 6 |
| Paranjpe et al., 2020           | * | * | * |   |  |   | * |  | * | * |   | 6 |
| Cummings et al., 2020           | * | * | * |   |  | * | * |  | * | * |   | 7 |
| Guo et al., 2020                |   | * | * | * |  |   | * |  |   | * | * | 6 |
| Zhu et al., 2020                | * |   |   | * |  | * | * |  | * | * |   | 6 |
| Yin et al., 2020                |   | * | * | * |  |   | * |  | * | * | * | 7 |
| Sun et al., 2020                |   | * | * | * |  |   |   |  | * | * |   | 5 |

|                            |   |   |   |   |  |   |   |  |   |   |   |   |
|----------------------------|---|---|---|---|--|---|---|--|---|---|---|---|
| Luo et al., 2020           | * | * | * |   |  | * | * |  | * | * | * | 8 |
| Zhang et al., 2020         | * | * | * | * |  |   | * |  | * | * | * | 8 |
| Yao et al., 2020           |   | * | * | * |  | * | * |  | * | * |   | 7 |
| Zangrillo et al., 2020     |   | * | * | * |  | * | * |  | * | * |   | 7 |
| Yan et al., 2020           |   | * | * | * |  | * | * |  | * |   |   | 6 |
| Tedeschi et al., 2020      |   | * | * | * |  | * |   |  |   | * | * | 6 |
| Nikpouraghdam et al., 2020 | * | * | * | * |  | * | * |  |   | * | * | 8 |
| Benelli et al., 2020       | * | * | * |   |  | * | * |  | * | * |   | 7 |
| Levy et al., 2020          | * | * | * | * |  | * | * |  |   | * | * | 8 |
| Sneep et al., 2020         |   | * | * |   |  | * |   |  | * | * |   | 5 |
| Mehra et al., 2020         | * | * | * | * |  | * | * |  | * | * | * | 9 |
| Grasselli et al., 2020     | * |   | * | * |  |   | * |  | * | * |   | 6 |
| Du et al., 2020            | * |   | * | * |  | * | * |  | * | * |   | 7 |
| Zhang et al., 2020         | * |   | * | * |  | * | * |  | * | * |   | 7 |
| Kim et al., 2020           | * |   | * |   |  | * | * |  | * | * |   | 6 |
| Yao et al., 2020           | * |   | * |   |  | * | * |  | * | * |   | 6 |
| Cheng et al., 2020         | * |   | * |   |  |   | * |  | * | * | * | 6 |

| Section/topic             | #  | Checklist item                                                                                                                                                                                                                                                                                              | Reported on page #         |
|---------------------------|----|-------------------------------------------------------------------------------------------------------------------------------------------------------------------------------------------------------------------------------------------------------------------------------------------------------------|----------------------------|
| <b>TITLE</b>              |    |                                                                                                                                                                                                                                                                                                             |                            |
| Title                     | 1  | Identify the report as a systematic review, meta-analysis, or both.                                                                                                                                                                                                                                         | 1                          |
| <b>ABSTRACT</b>           |    |                                                                                                                                                                                                                                                                                                             |                            |
| Structured summary        | 2  | Provide a structured summary including, as applicable: background; objectives; data sources; study eligibility criteria, participants, and interventions; study appraisal and synthesis methods; results; limitations; conclusions and implications of key findings; systematic review registration number. | 1-2                        |
| <b>INTRODUCTION</b>       |    |                                                                                                                                                                                                                                                                                                             |                            |
| Rationale                 | 3  | Describe the rationale for the review in the context of what is already known.                                                                                                                                                                                                                              | 3                          |
| Objectives                | 4  | Provide an explicit statement of questions being addressed with reference to participants, interventions, comparisons, outcomes, and study design (PICOS).                                                                                                                                                  | 4                          |
| <b>METHODS</b>            |    |                                                                                                                                                                                                                                                                                                             |                            |
| Protocol and registration | 5  | Indicate if a review protocol exists, if and where it can be accessed (e.g., Web address), and, if available, provide registration information including registration number.                                                                                                                               | NA                         |
| Eligibility criteria      | 6  | Specify study characteristics (e.g., PICOS, length of follow-up) and report characteristics (e.g., years considered, language, publication status) used as criteria for eligibility, giving rationale.                                                                                                      | 5                          |
| Information sources       | 7  | Describe all information sources (e.g., databases with dates of coverage, contact with study authors to identify additional studies) in the search and date last searched.                                                                                                                                  | 4                          |
| Search                    | 8  | Present full electronic search strategy for at least one database, including any limits used, such that it could be repeated.                                                                                                                                                                               | 4, Supplementary table 1-4 |
| Study selection           | 9  | State the process for selecting studies (i.e., screening, eligibility, included in systematic review, and, if applicable, included in the meta-analysis).                                                                                                                                                   | 5                          |
| Data collection process   | 10 | Describe method of data extraction from reports (e.g., piloted forms, independently, in duplicate) and any processes for obtaining and confirming data from investigators.                                                                                                                                  | 5                          |



|                                    |    |                                                                                                                                                                                                                        |    |
|------------------------------------|----|------------------------------------------------------------------------------------------------------------------------------------------------------------------------------------------------------------------------|----|
| Data items                         | 11 | List and define all variables for which data were sought (e.g., PICOS, funding sources) and any assumptions and simplifications made.                                                                                  | 5  |
| Risk of bias in individual studies | 12 | Describe methods used for assessing risk of bias of individual studies (including specification of whether this was done at the study or outcome level), and how this information is to be used in any data synthesis. | NA |
| Summary measures                   | 13 | State the principal summary measures (e.g., risk ratio, difference in means).                                                                                                                                          | 7  |
| Synthesis of results               | 14 | Describe the methods of handling data and combining results of studies, if done, including measures of consistency (e.g., $I^2$ ) for each meta-analysis.                                                              | 7  |

| Section/topic                 | #  | Checklist item                                                                                                                                                                                           | Reported on page # |
|-------------------------------|----|----------------------------------------------------------------------------------------------------------------------------------------------------------------------------------------------------------|--------------------|
| Risk of bias across studies   | 15 | Specify any assessment of risk of bias that may affect the cumulative evidence (e.g., publication bias, selective reporting within studies).                                                             | NA                 |
| Additional analyses           | 16 | Describe methods of additional analyses (e.g., sensitivity or subgroup analyses, meta-regression), if done, indicating which were pre-specified.                                                         | 6                  |
| <b>RESULTS</b>                |    |                                                                                                                                                                                                          |                    |
| Study selection               | 17 | Give numbers of studies screened, assessed for eligibility, and included in the review, with reasons for exclusions at each stage, ideally with a flow diagram.                                          | 7                  |
| Study characteristics         | 18 | For each study, present characteristics for which data were extracted (e.g., study size, PICOS, follow-up period) and provide the citations.                                                             | 7                  |
| Risk of bias within studies   | 19 | Present data on risk of bias of each study and, if available, any outcome level assessment (see item 12).                                                                                                | NA                 |
| Results of individual studies | 20 | For all outcomes considered (benefits or harms), present, for each study: (a) simple summary data for each intervention group (b) effect estimates and confidence intervals, ideally with a forest plot. | 8, Tables 1, and   |

|                             |    |                                                                                                                                                                                      |                       |
|-----------------------------|----|--------------------------------------------------------------------------------------------------------------------------------------------------------------------------------------|-----------------------|
|                             |    |                                                                                                                                                                                      | Supplementary table 5 |
| Synthesis of results        | 21 | Present results of each meta-analysis done, including confidence intervals and measures of consistency.                                                                              | 8-9                   |
| Risk of bias across studies | 22 | Present results of any assessment of risk of bias across studies (see Item 15).                                                                                                      | 9                     |
| Additional analysis         | 23 | Give results of additional analyses, if done (e.g., sensitivity or subgroup analyses, meta-regression [see Item 16]).                                                                | 9-10                  |
| <b>DISCUSSION</b>           |    |                                                                                                                                                                                      |                       |
| Summary of evidence         | 24 | Summarize the main findings including the strength of evidence for each main outcome; consider their relevance to key groups (e.g., healthcare providers, users, and policy makers). | 10                    |
| Limitations                 | 25 | Discuss limitations at study and outcome level (e.g., risk of bias), and at review-level (e.g., incomplete retrieval of identified research, reporting bias).                        | 12                    |
| Conclusions                 | 26 | Provide a general interpretation of the results in the context of other evidence, and implications for future research.                                                              | 13                    |
| <b>FUNDING</b>              |    |                                                                                                                                                                                      |                       |
| Funding                     | 27 | Describe sources of funding for the systematic review and other support (e.g., supply of data); role of funders for the systematic review.                                           | Title page            |

*From:* Moher D, Liberati A, Tetzlaff J, Altman DG, The PRISMA Group (2009). Preferred Reporting Items for Systematic Reviews and Meta-Analyses: The PRISMA Statement. PLoS Med 6(6): e1000097. doi:10.1371/journal.pmed1000097

## Supplementary figures

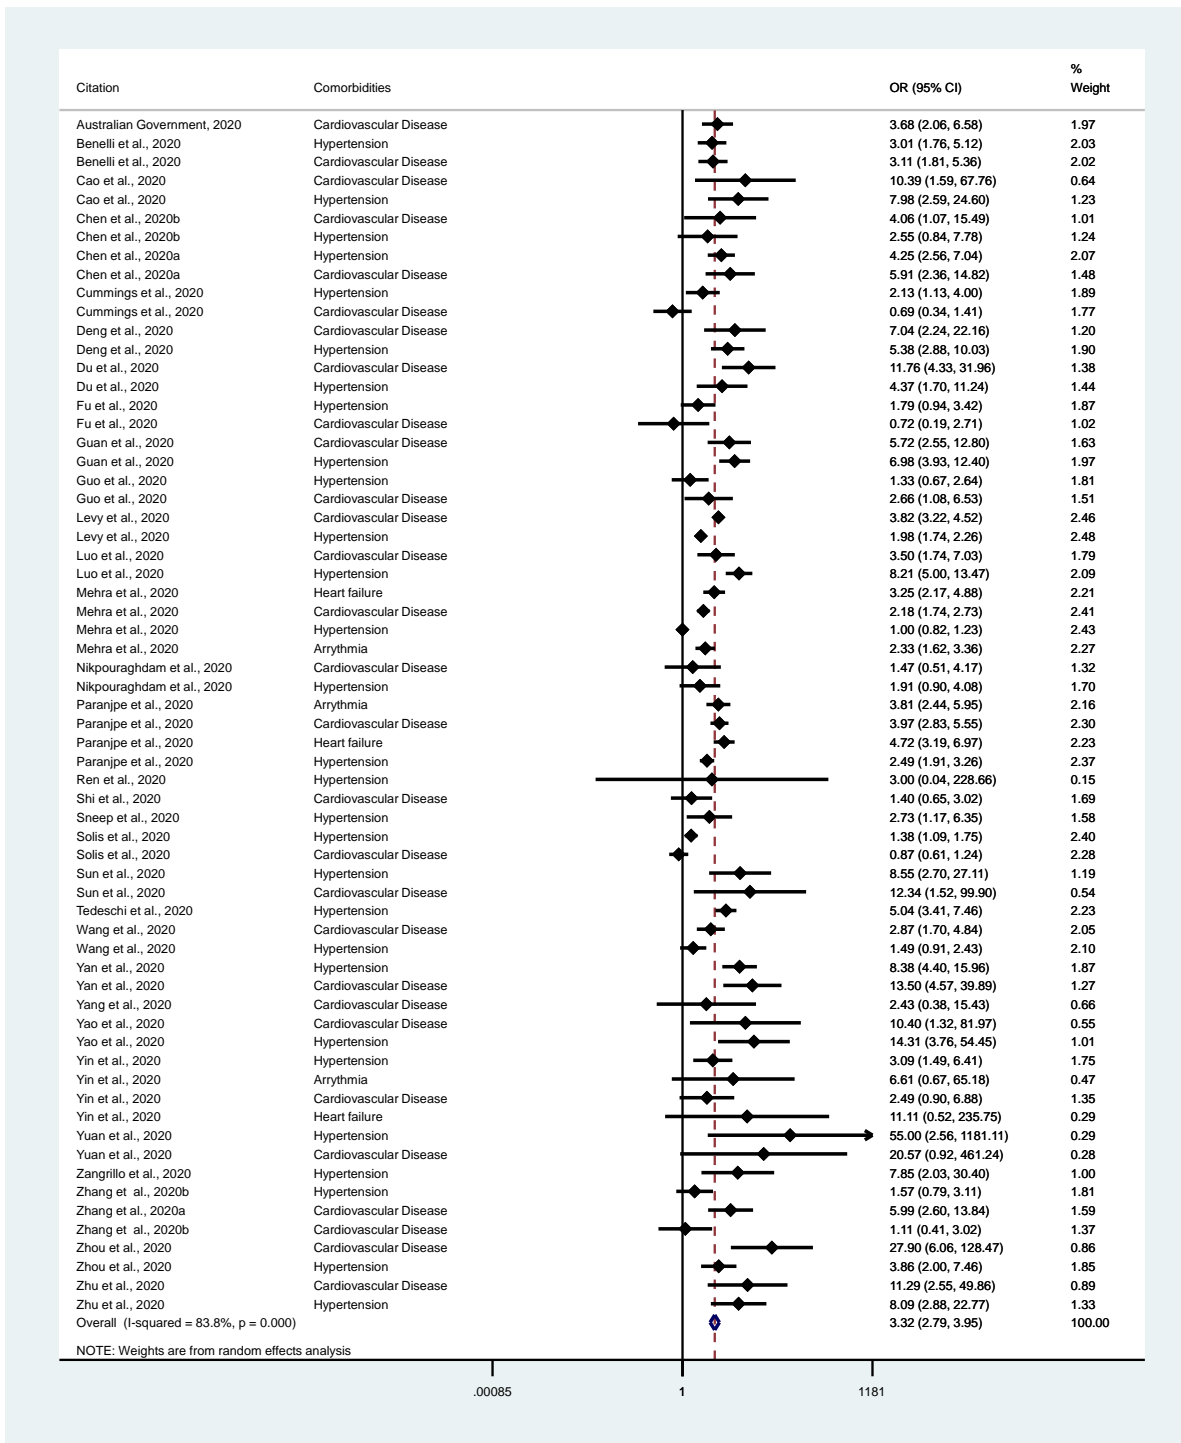

**Figure S1.** Likelihoods of death among patients with cardiovascular system diseases infected further with COVID-19 disease

(a)

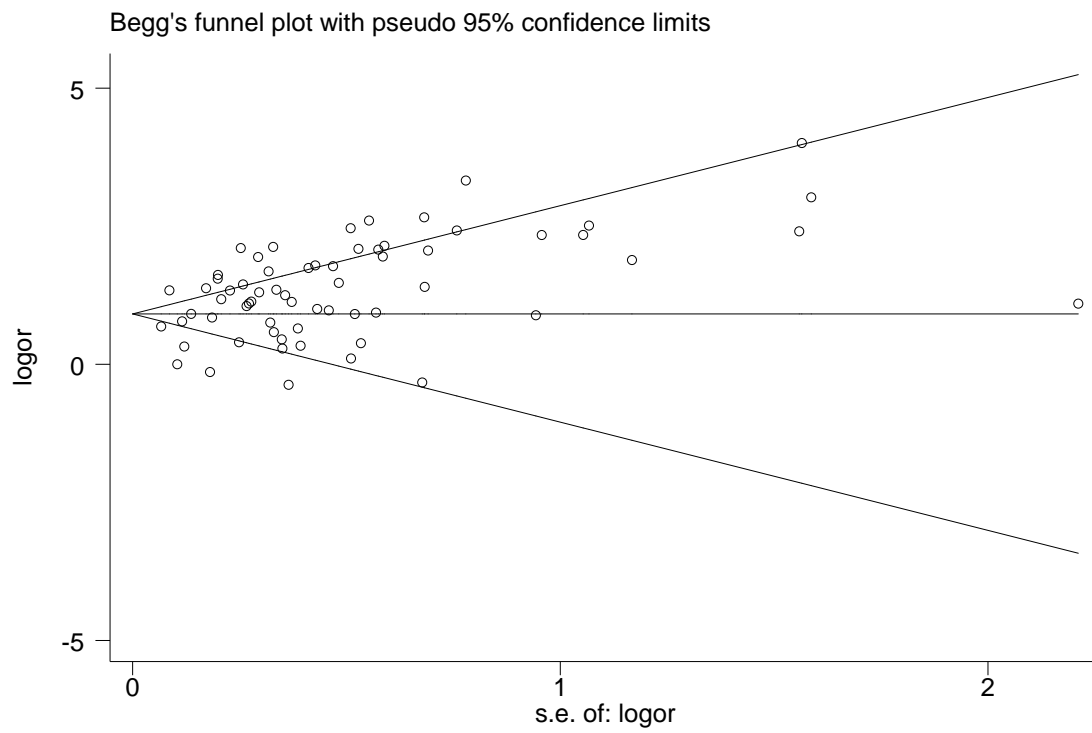

(b)

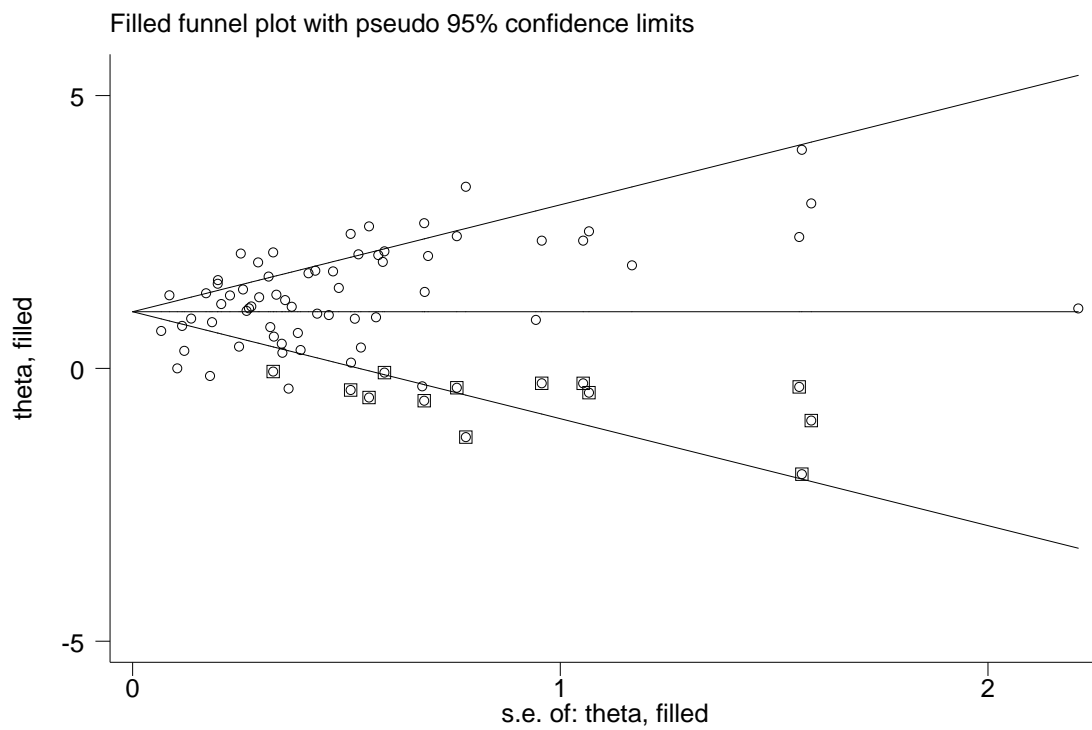

**Figure S1a.** Funnel plot without (a) and with trim and fill (b) estimate for cardiovascular systems diseases patients infected further with COVID-19 disease

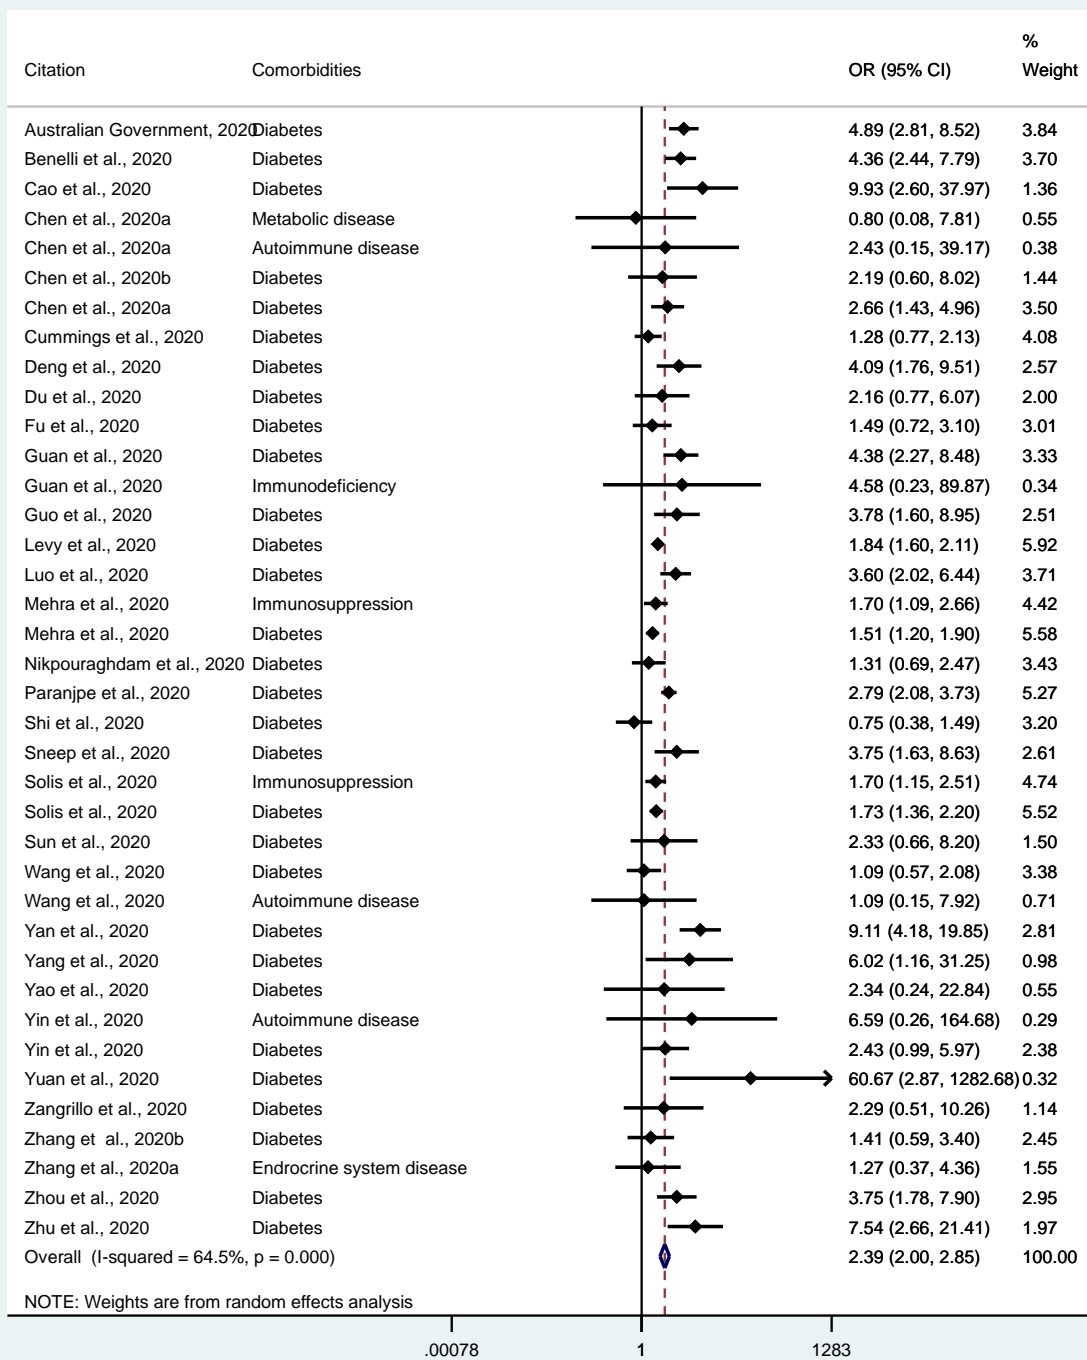

**Figure S2.** Likelihoods of death among patients with Immune and metabolic disorders patients infected further with COVID-19 disease

(a)

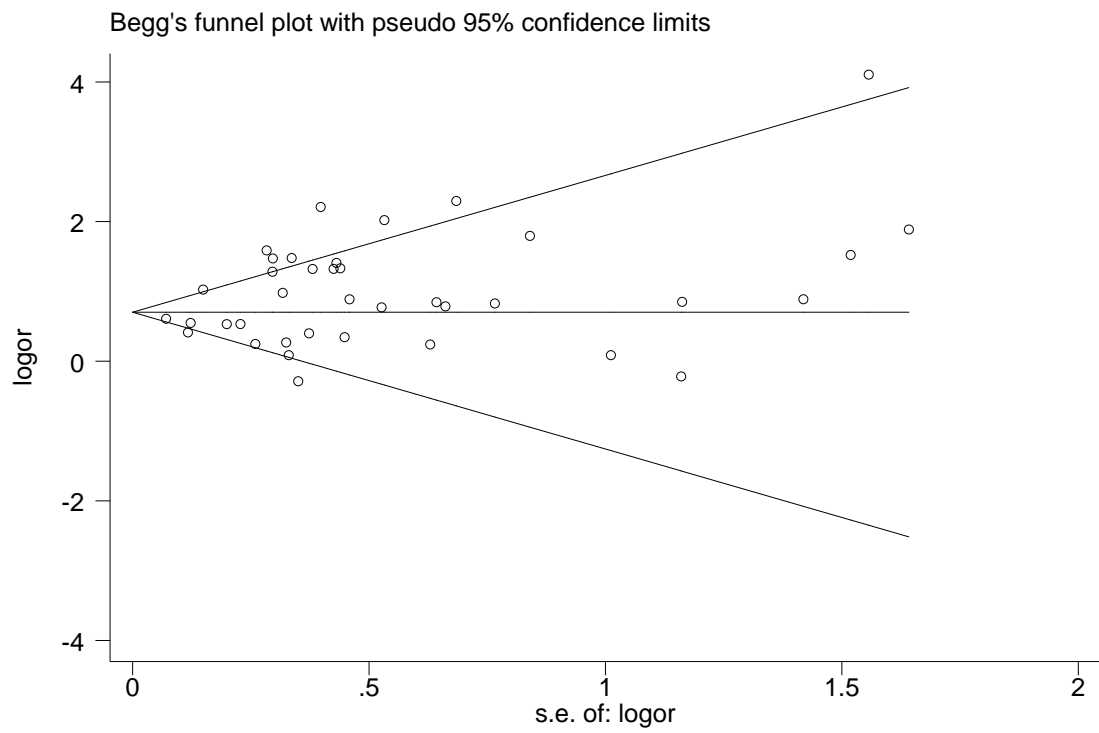

(b)

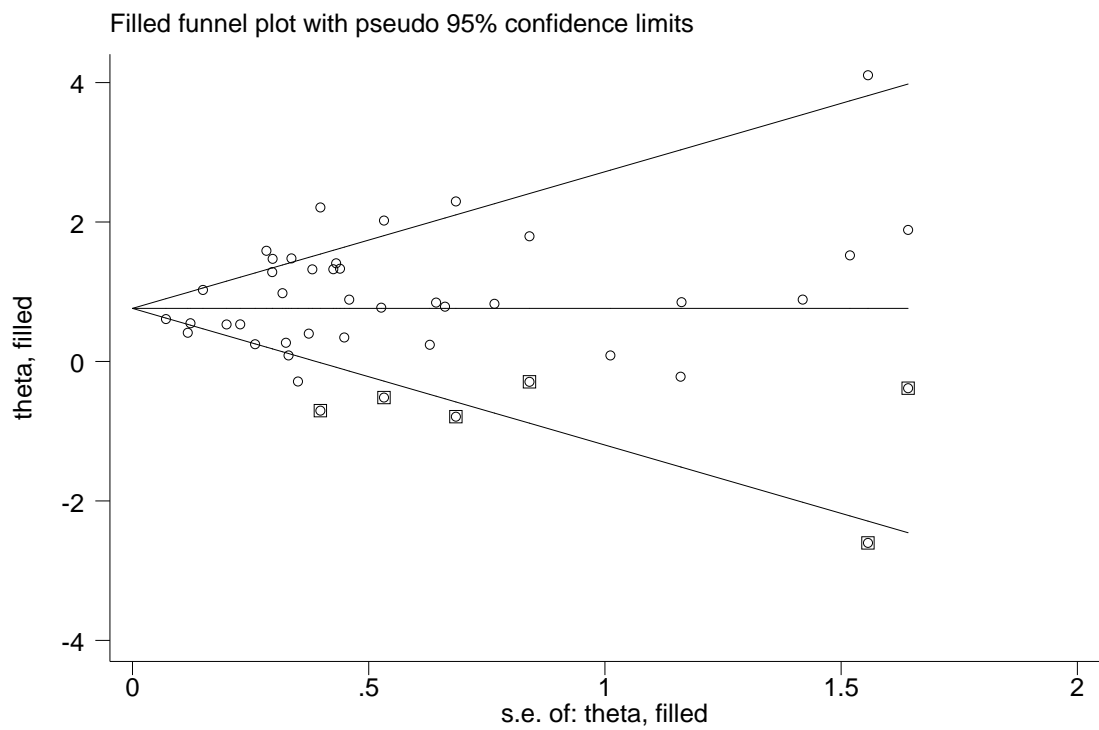

**Figure S2a.** Funnel plot without (a) and with trim and fill (b) estimate for Immune and metabolic disorders patients infected further with COVID-19 disease

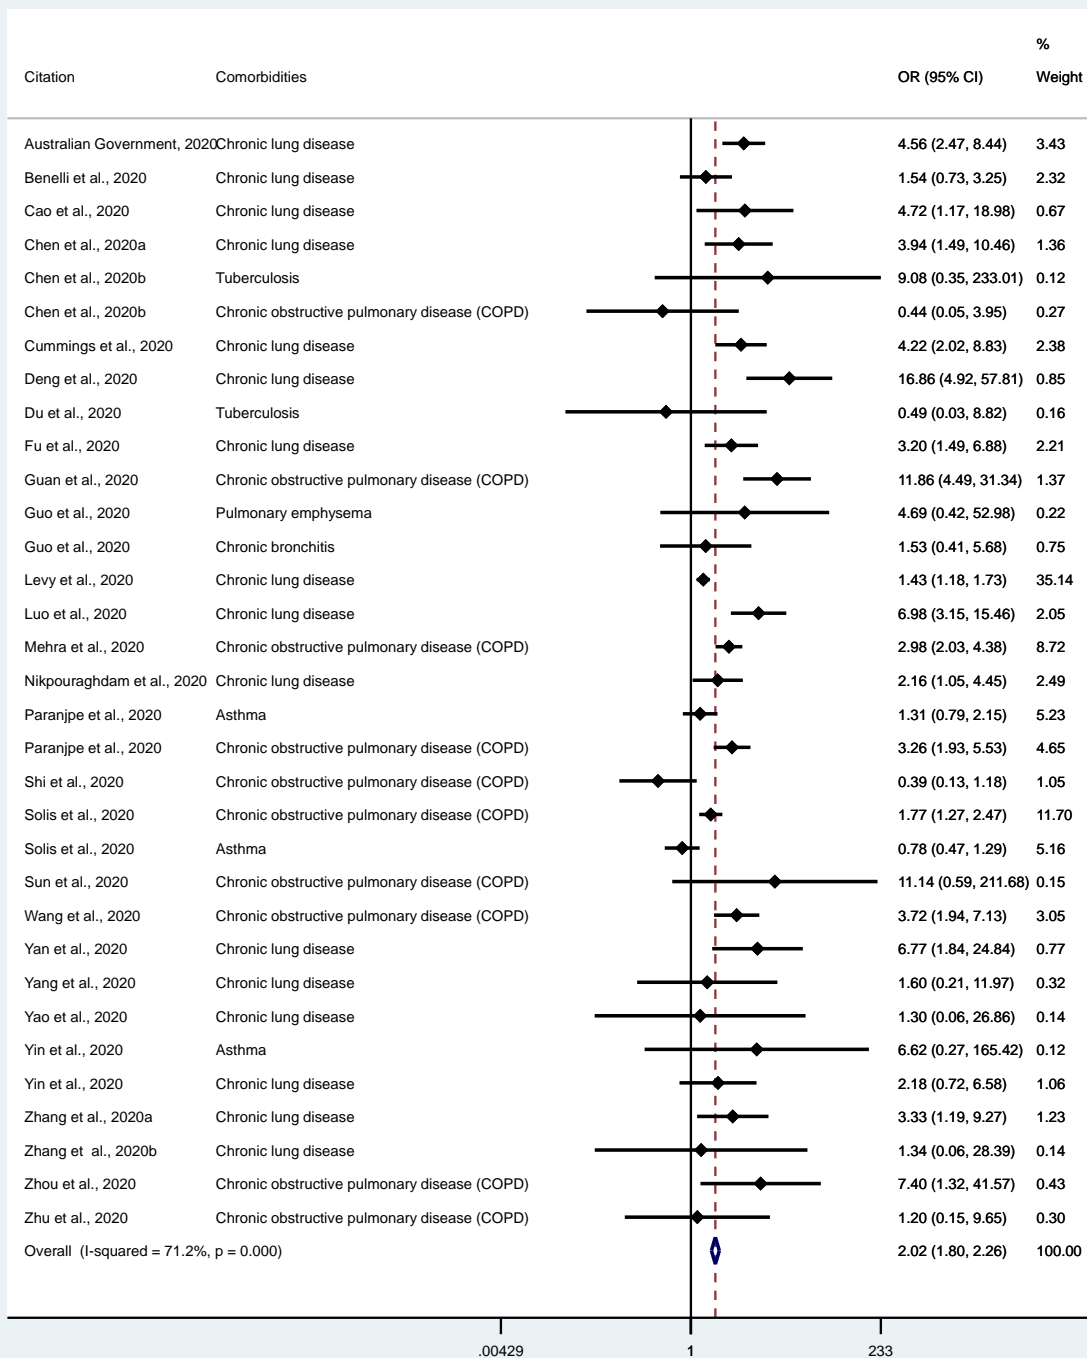

**Figure S3.** Likelihoods of death among patients with respiratory system diseases patients infected further with COVID-19 disease

(a)

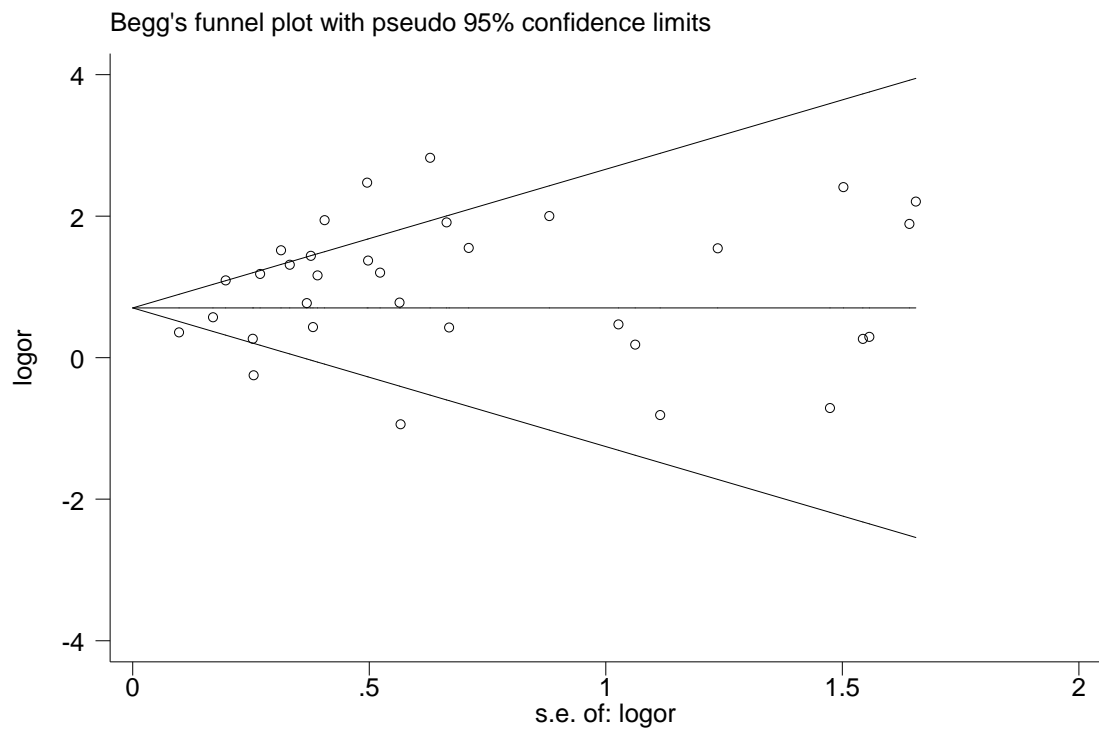

(b)

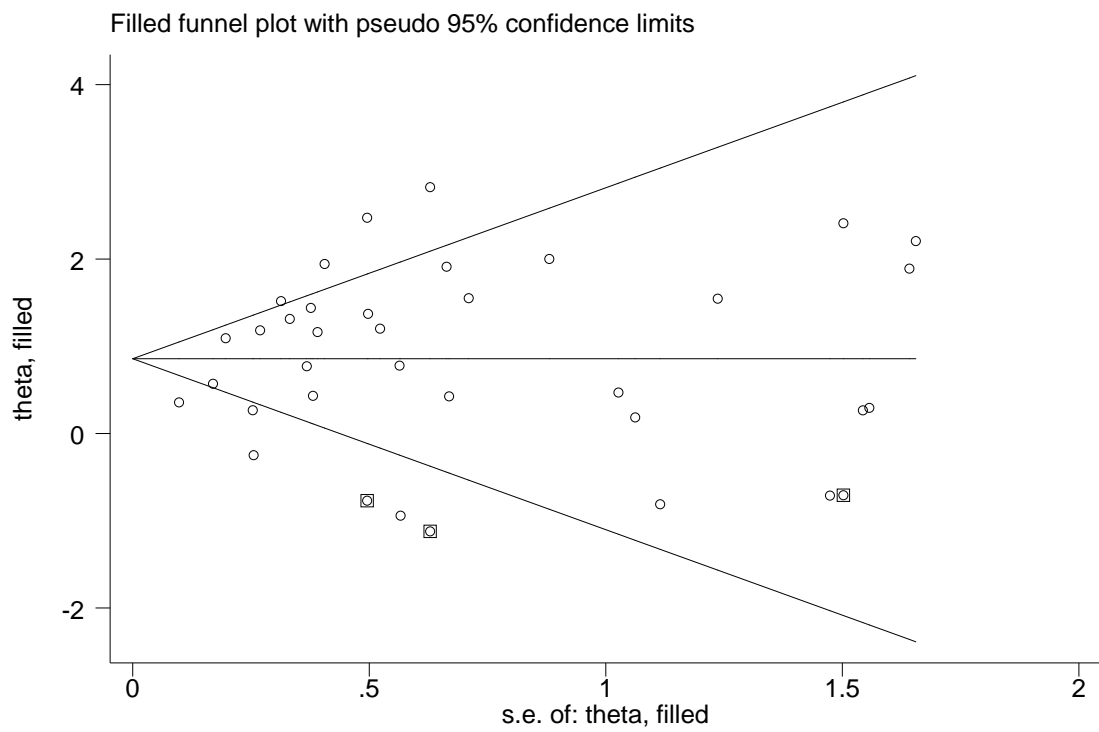

**Figure S3a.** Funnel plot without (a) and with trim and fill (b) estimate for Respiratory system diseases patients infected further with COVID-19 disease



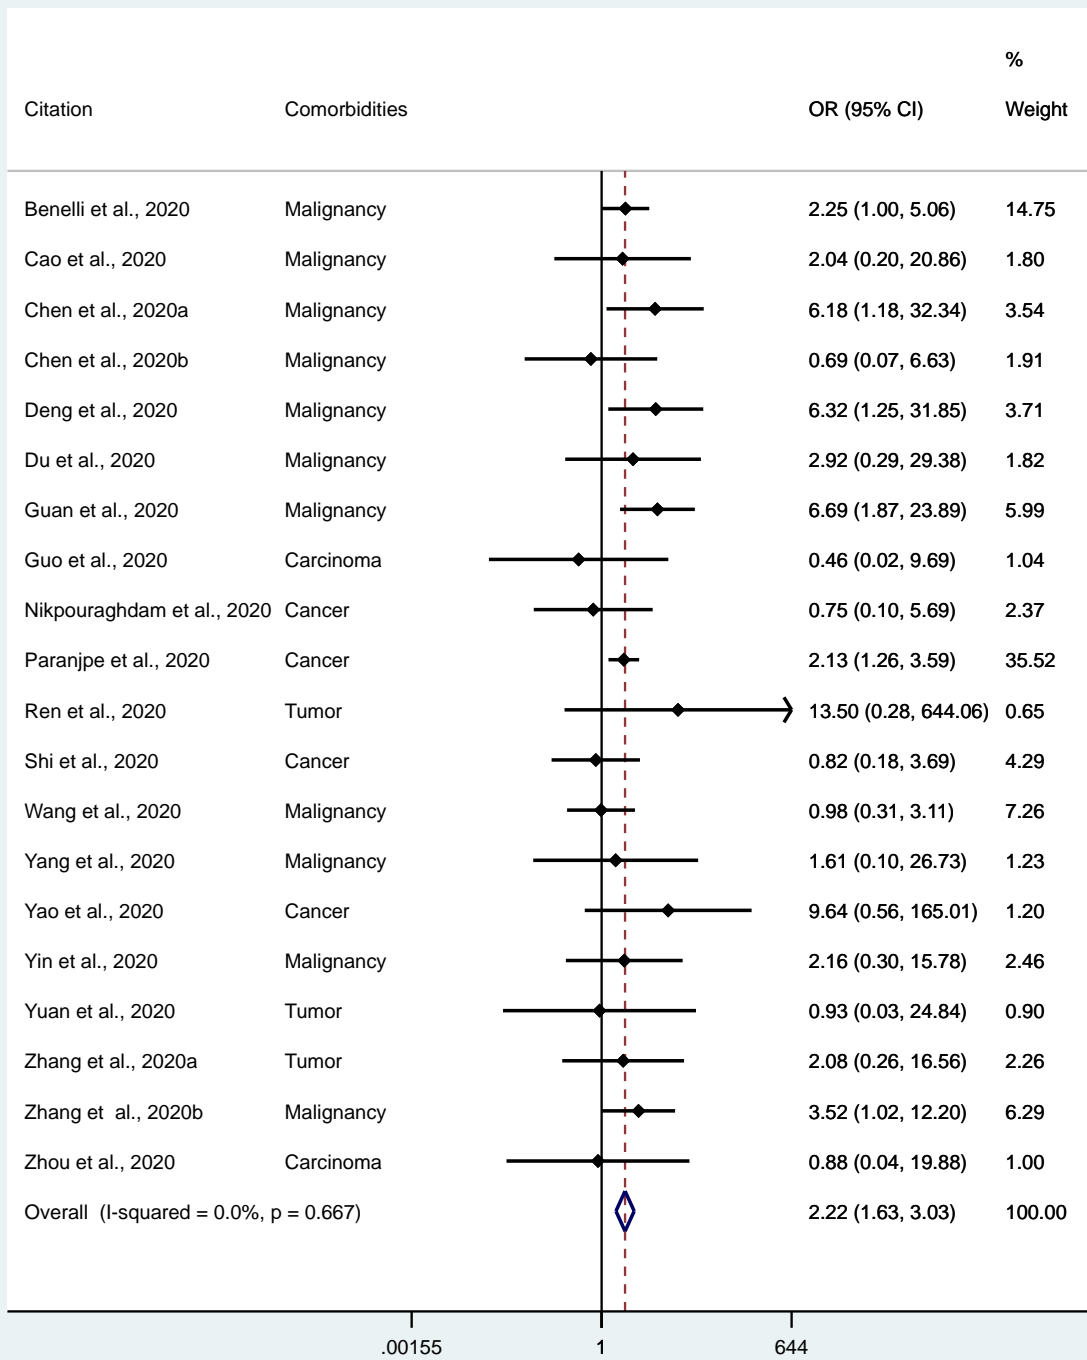

**Figure S4.** Likelihoods of death among patients with any type of cancers infected further with COVID-19 disease

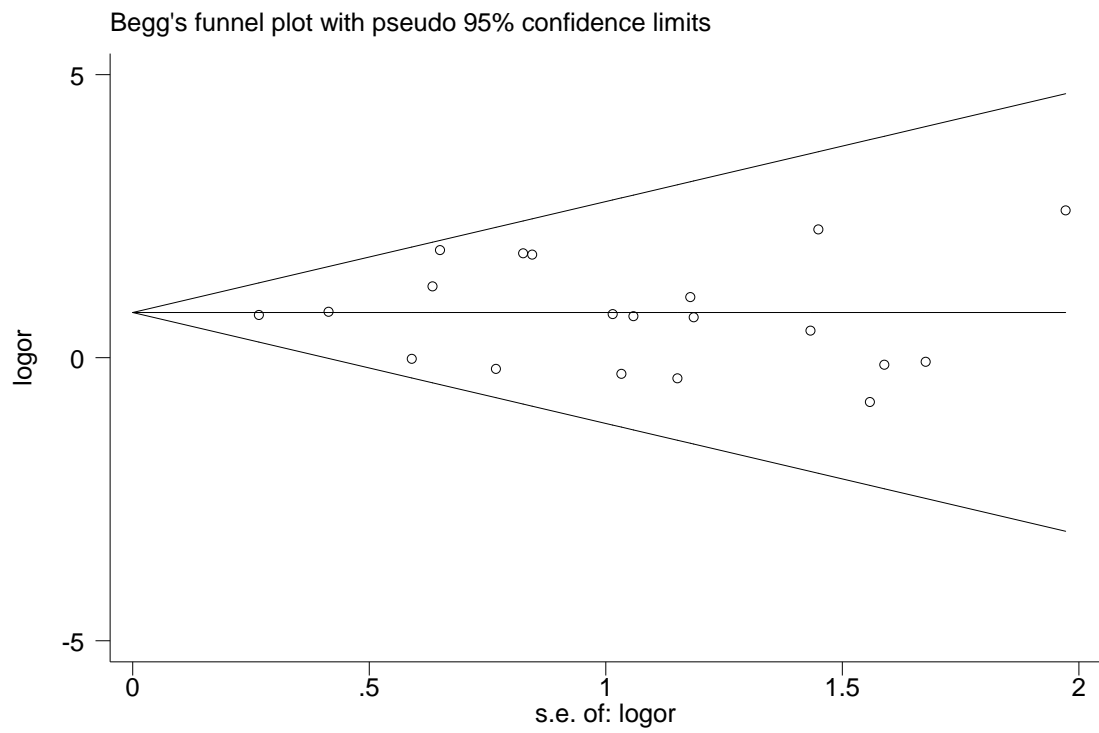

**Figure S4a.** Funnel plot for patients with any type of cancers infected further with COVID-19 disease

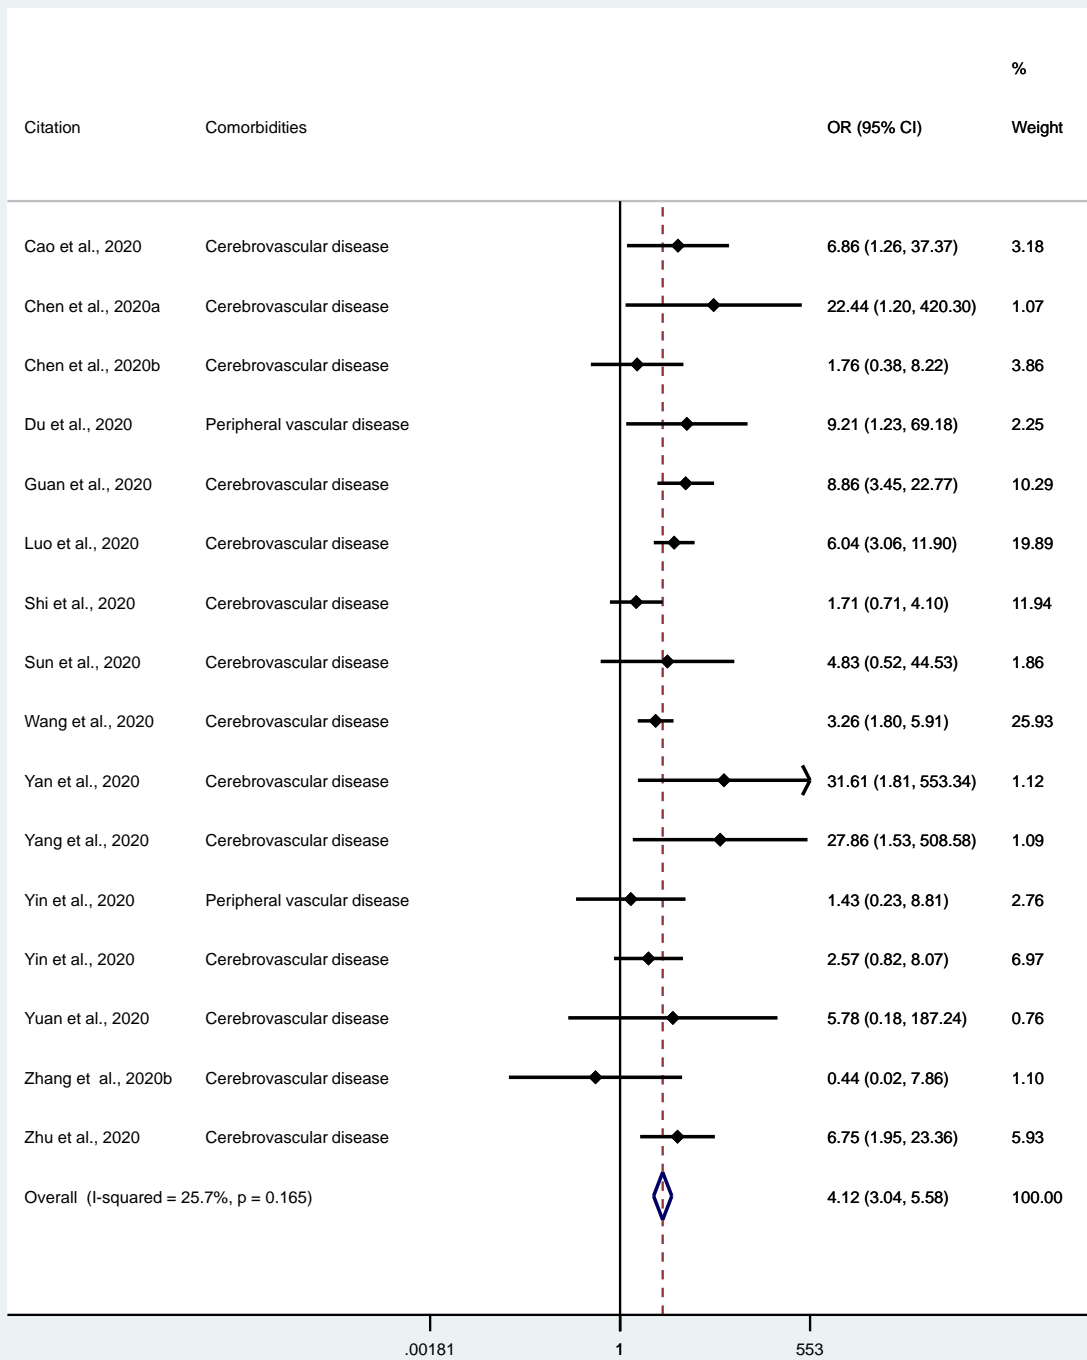

**Figure S5.** Likelihoods of death among patients with cerebrovascular system diseases patients infected further with COVID-19 disease

(a)

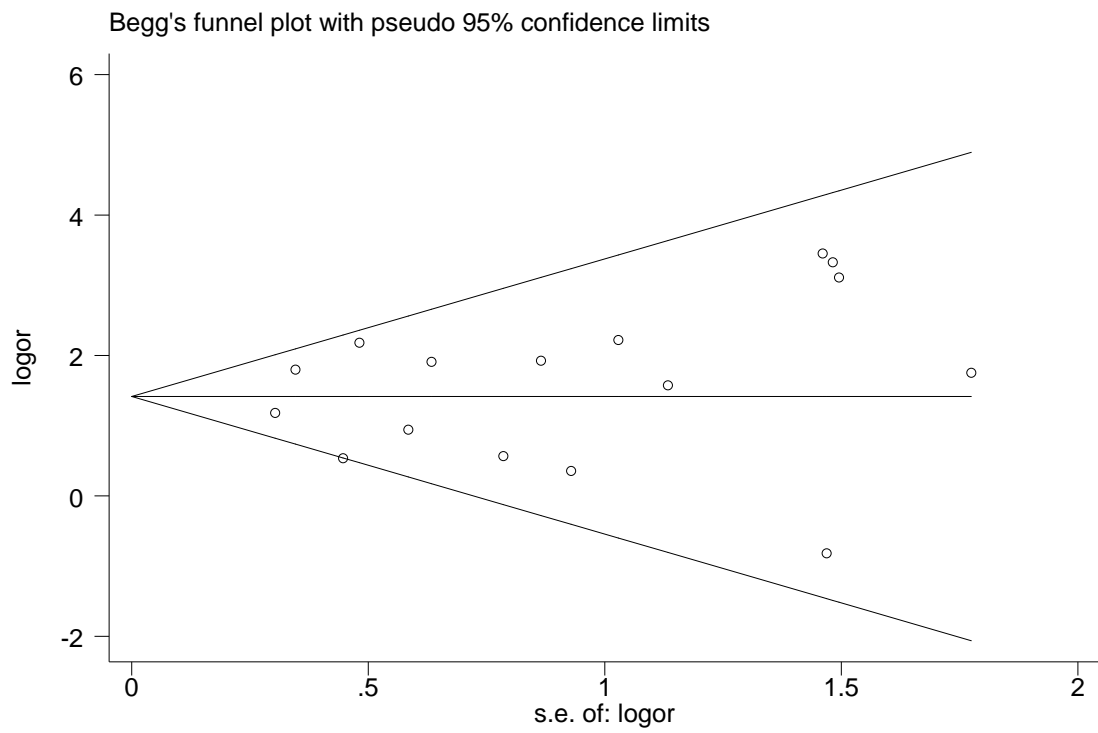

(b)

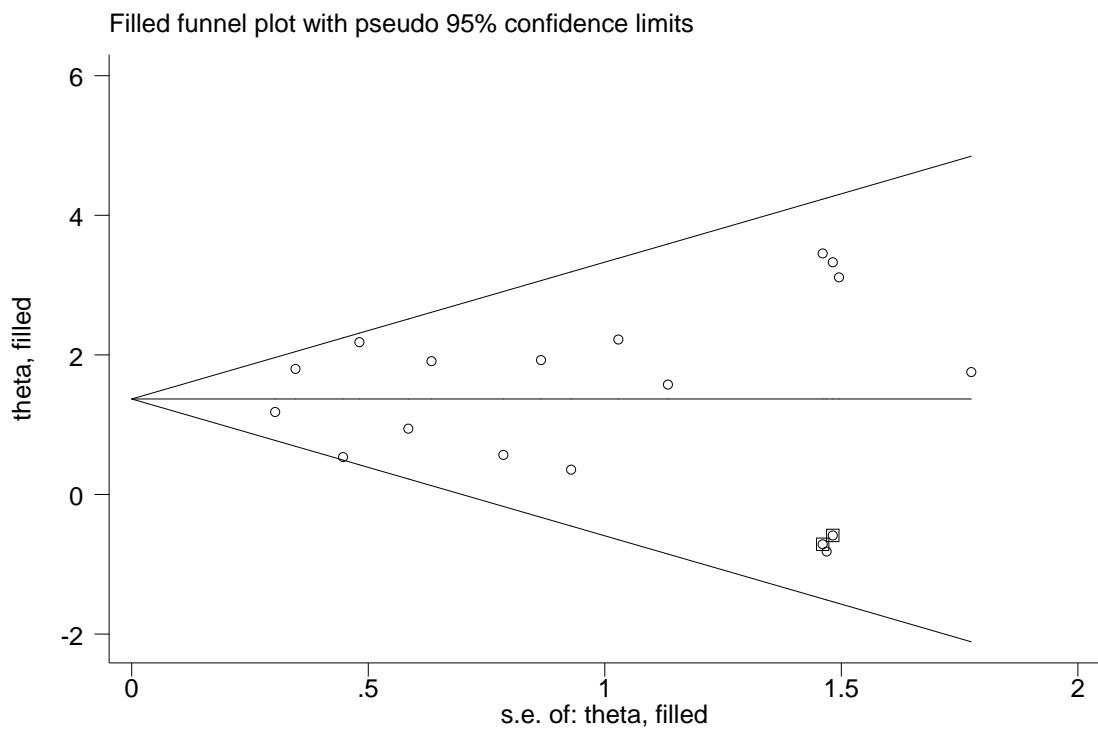

**Figure 5a.** Funnel plot without (a) and with trim and fill (b) estimate for Cerebrovascular system diseases patients infected further with COVID-19 disease

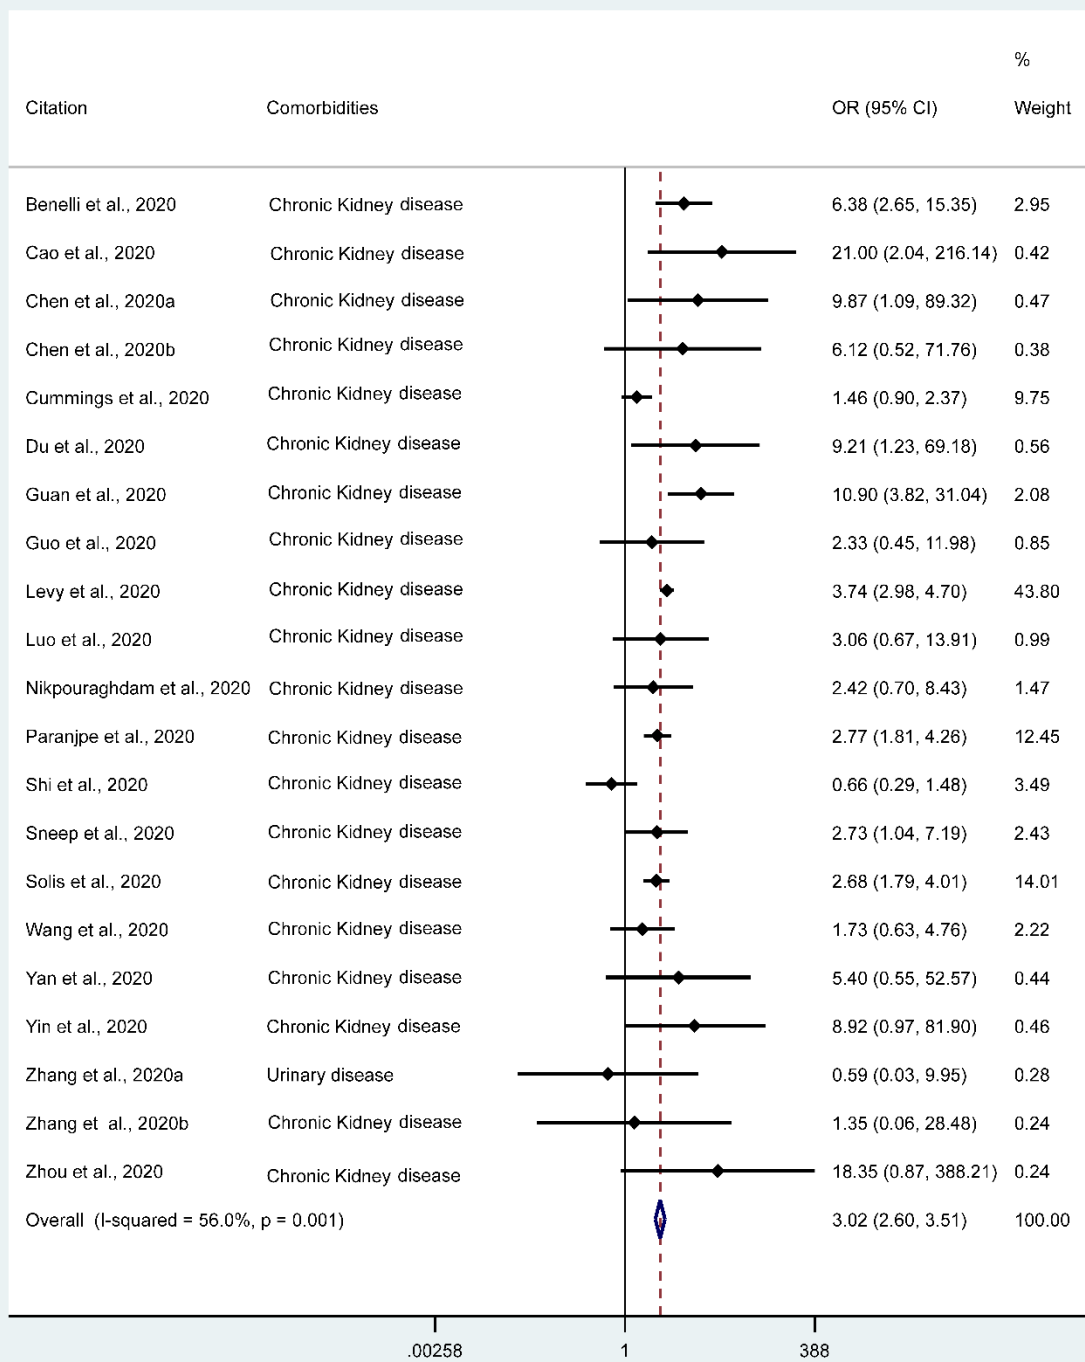

**Figure S6.** Likelihoods of death among patients with renal system diseases infected further with COVID-19 disease

(a)

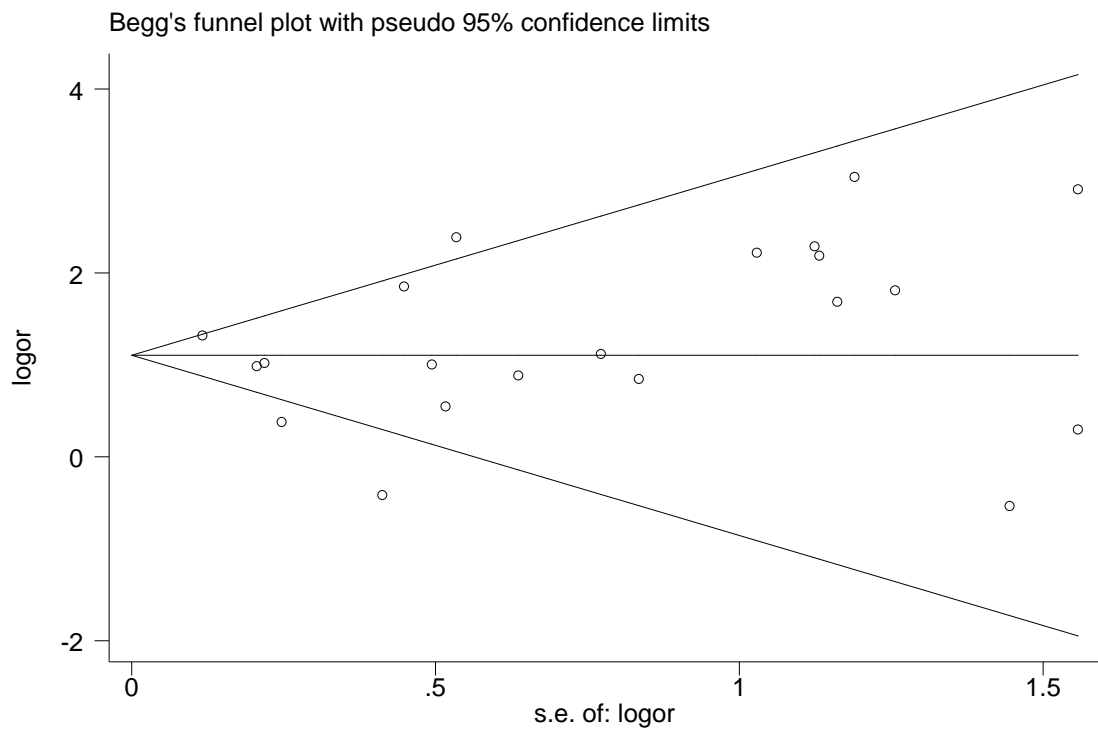

(b)

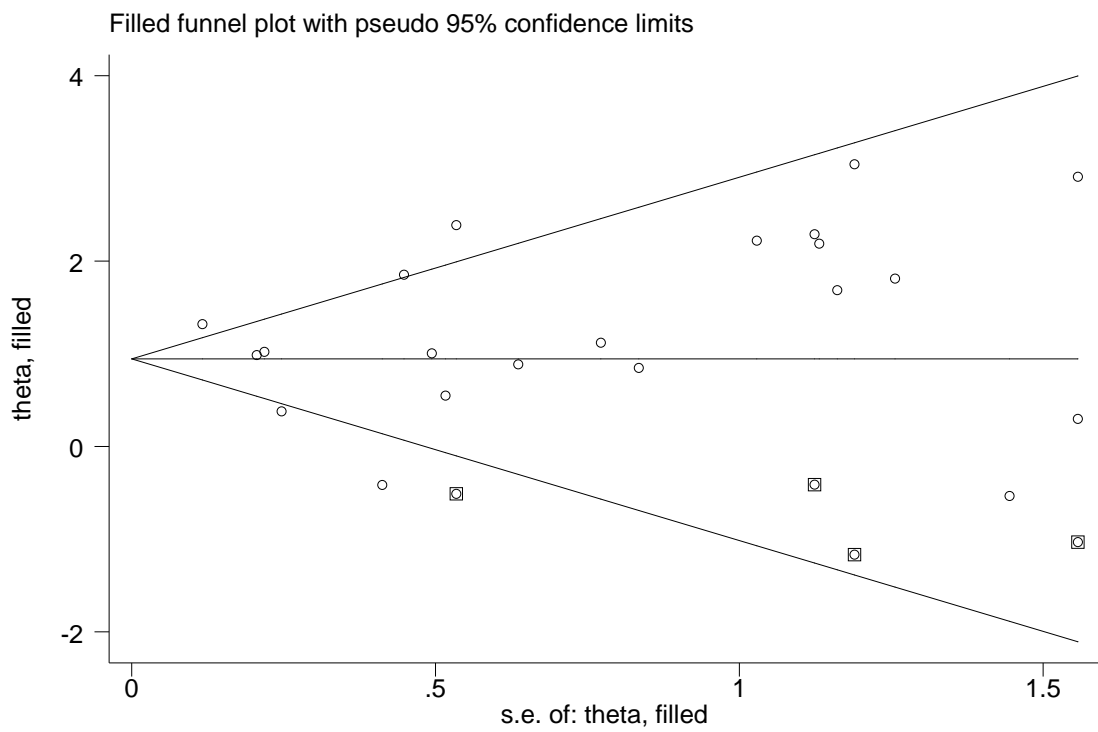

**Figure S6a.** Funnel plot without (a) and with trim and fill (b) estimate for renal system diseases patients infected further with COVID-19 disease

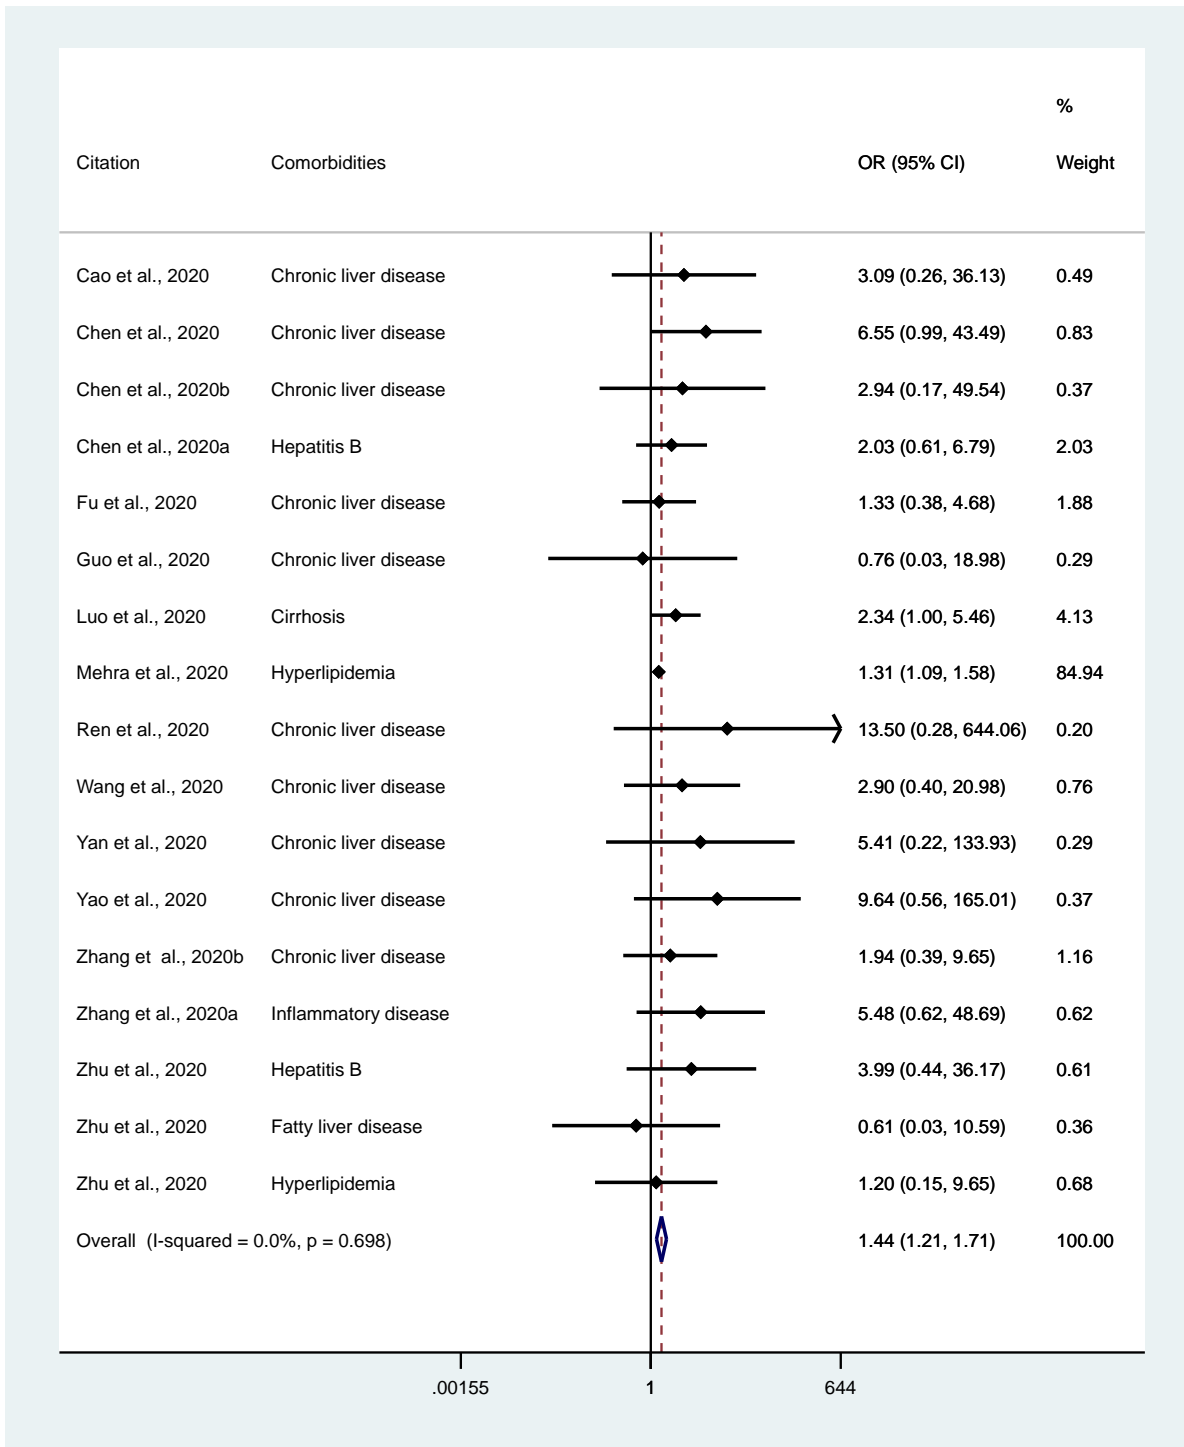

**Figure S7.** Likelihoods of death among patients with existing liver system diseases patients infected further with COVID-19 disease

(a)

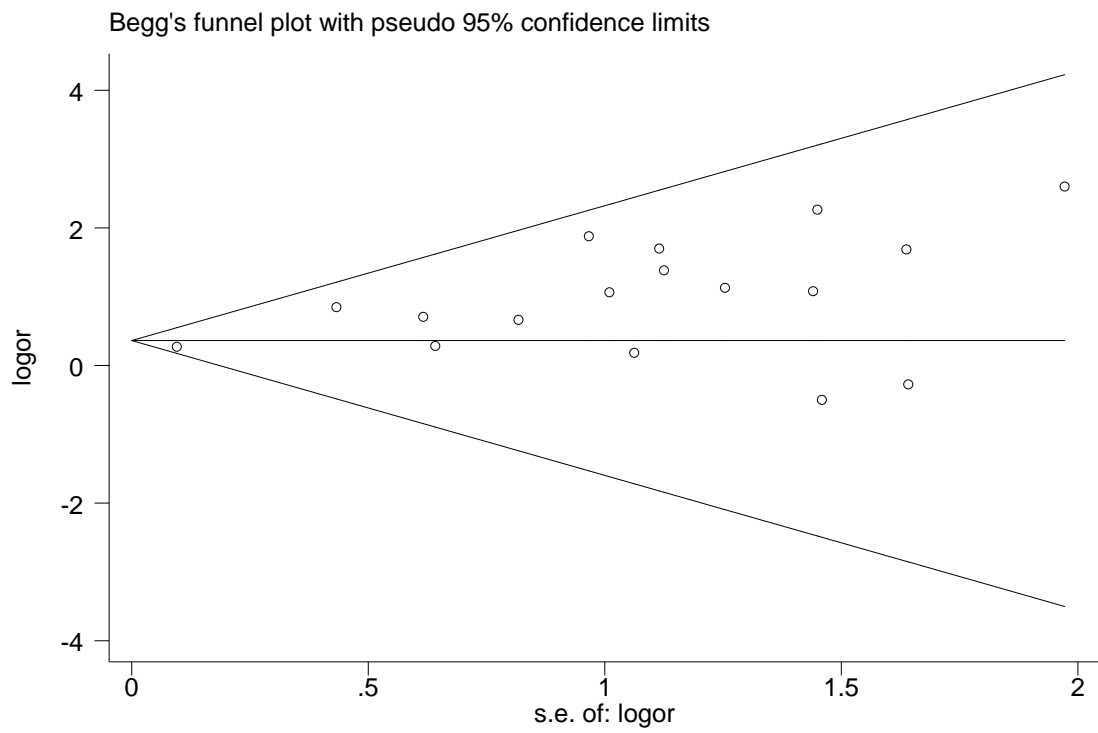

(b)

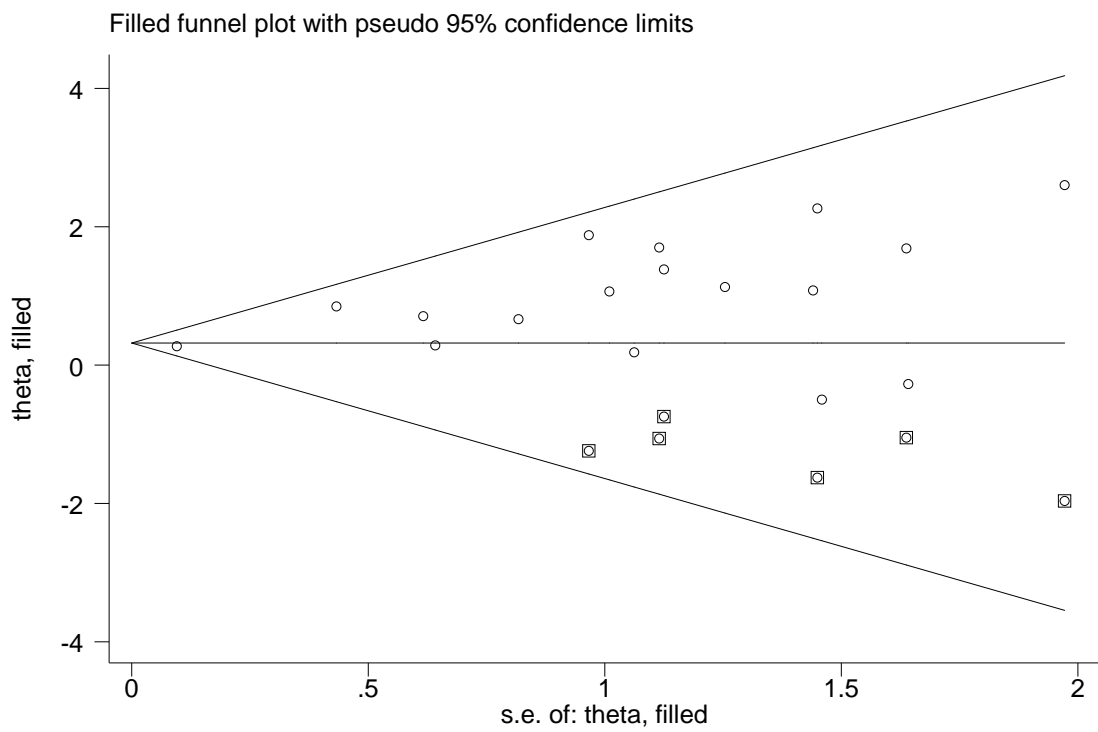

**Figure S7a.** Funnel plot without (a) and with trim and fill (b) estimate for liver system diseases patients infected further with COVID-19 disease



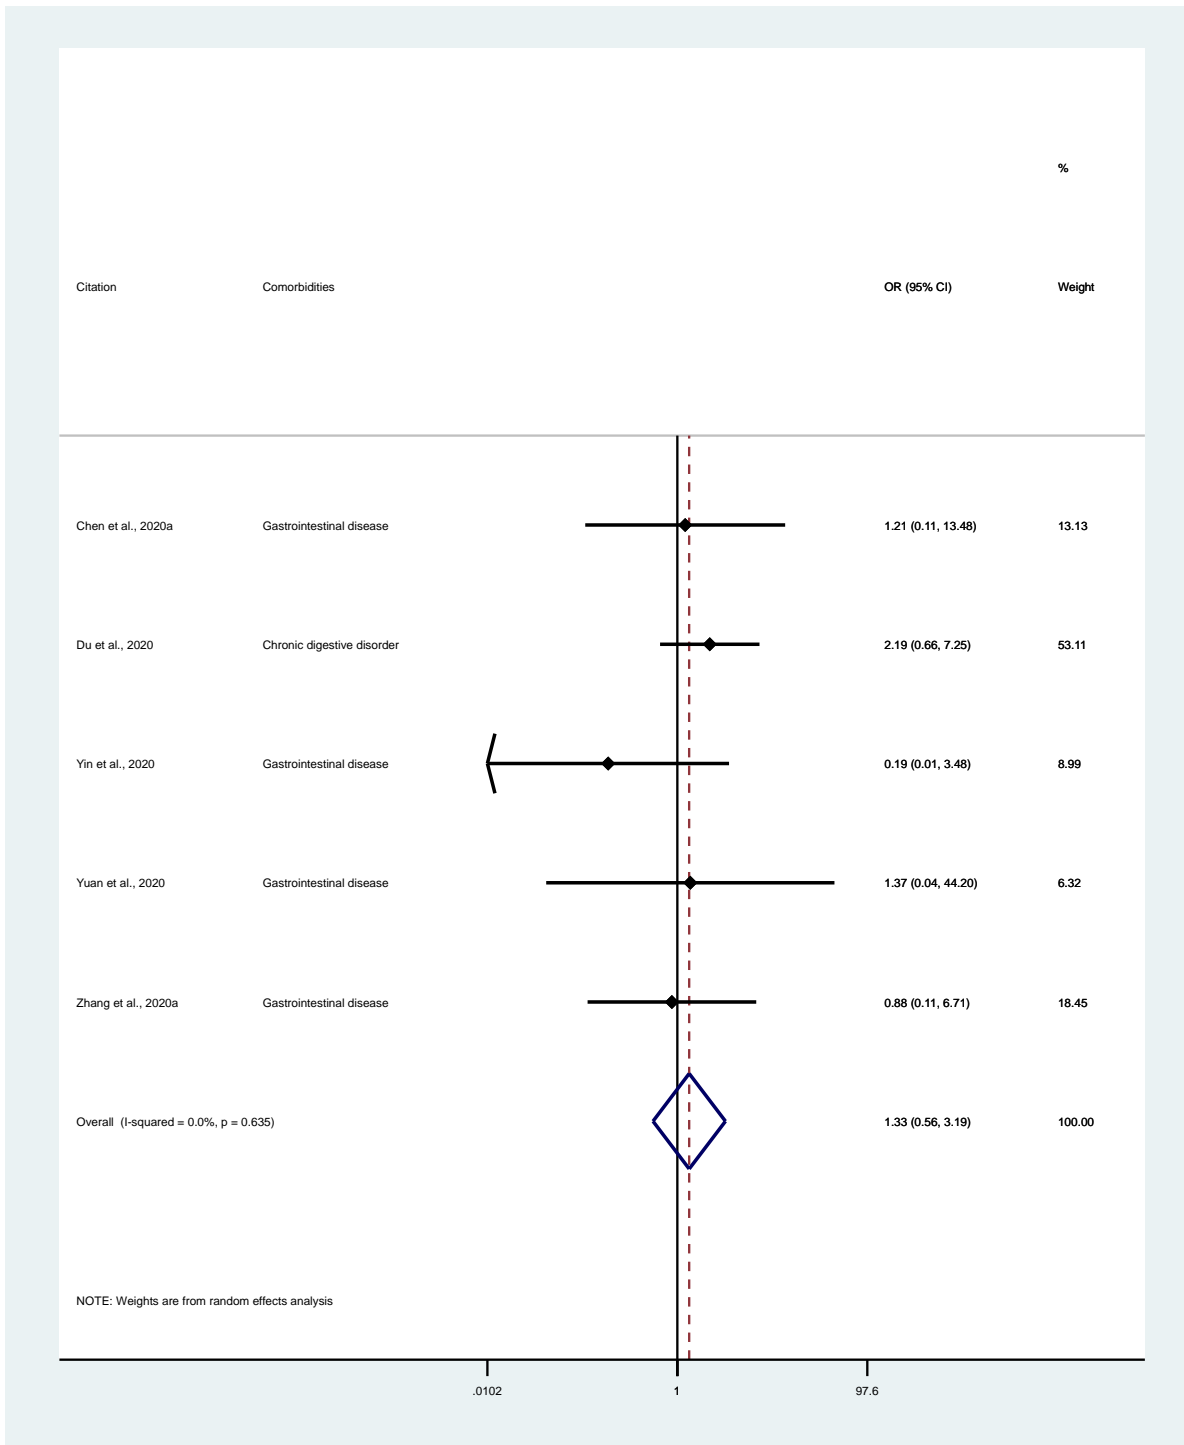

**Figure S8.** Likelihoods of death among patients with existing gastrointestinal system diseases patients infected further with COVID-19 disease

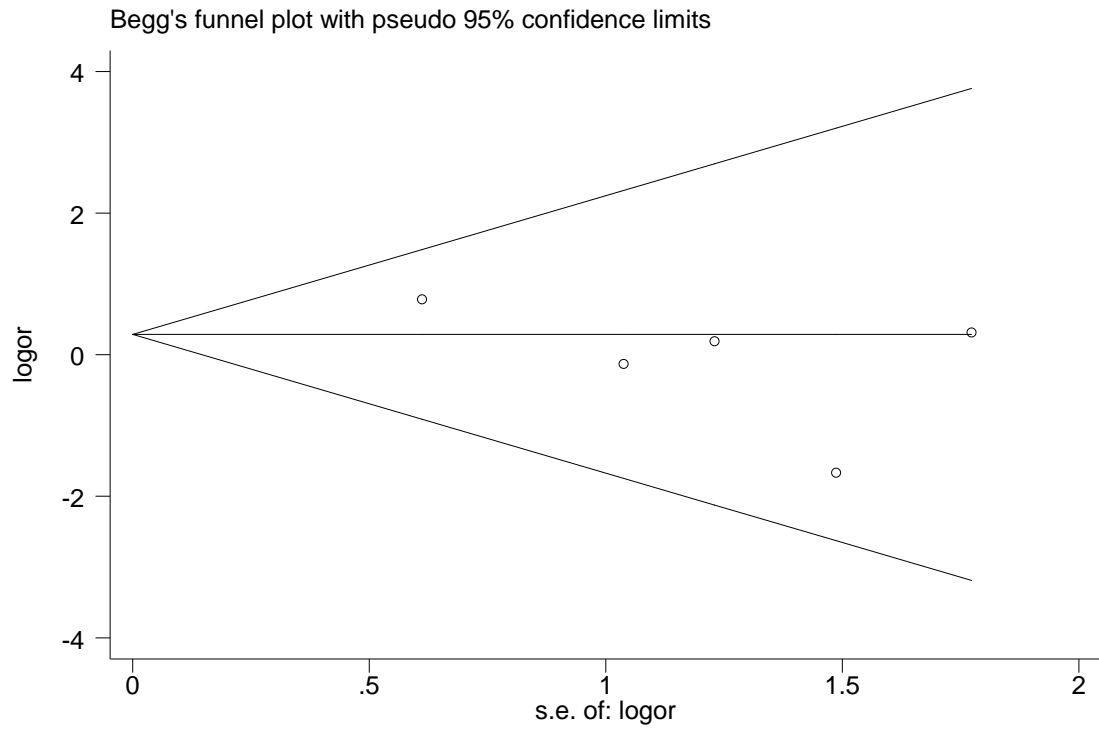

**Figure S8a.** Funnel plot for gastrointestinal system diseases patients infected further with COVID-19 disease
